# Supplementary material
Source: PubMed Central journal article supplement (PMC9444968)
Supplement: NIHMS1832697-supplement-Supplementary_Material.pdf [file NIHMS1832697-supplement-Supplementary_Material.pdf]

# The impact of socioeconomic status on subsequent neurological outcomes in multiple sclerosis

## **Supplementary Material**

### ***Zip Code Distribution of Research Participants***

In this study, the mean (and standard deviation) number of participants per zip code was 2.5 (3.5). The maximum number of participants in a single zip code was 29 participants. Six (out of 723) zip codes had 20 or more participants. To preserve confidentiality given the relatively small number of study participants per zip code, we did not report zip code specific distribution of participants.

### ***Additional Neighborhood Indicator of Socioeconomic Status (SES)***

Using the zip codes of the home residence of each participant at enrollment to query the American Community Survey SES datasets from 2014 to 2018 (abbreviated as 2018), we derived components of the neighborhood SES indicator, and calculated the area deprivation index (ADI) in 2018 as described in the Methods of the main text (section 2.3). The covariate-adjusted regression models using ADI in 2018 were shown in eTable 3.

**eFigure 1.** Pearson correlation between *neighborhood median household income* in 2015 and *area deprivation index* in 2015 in the combined data.

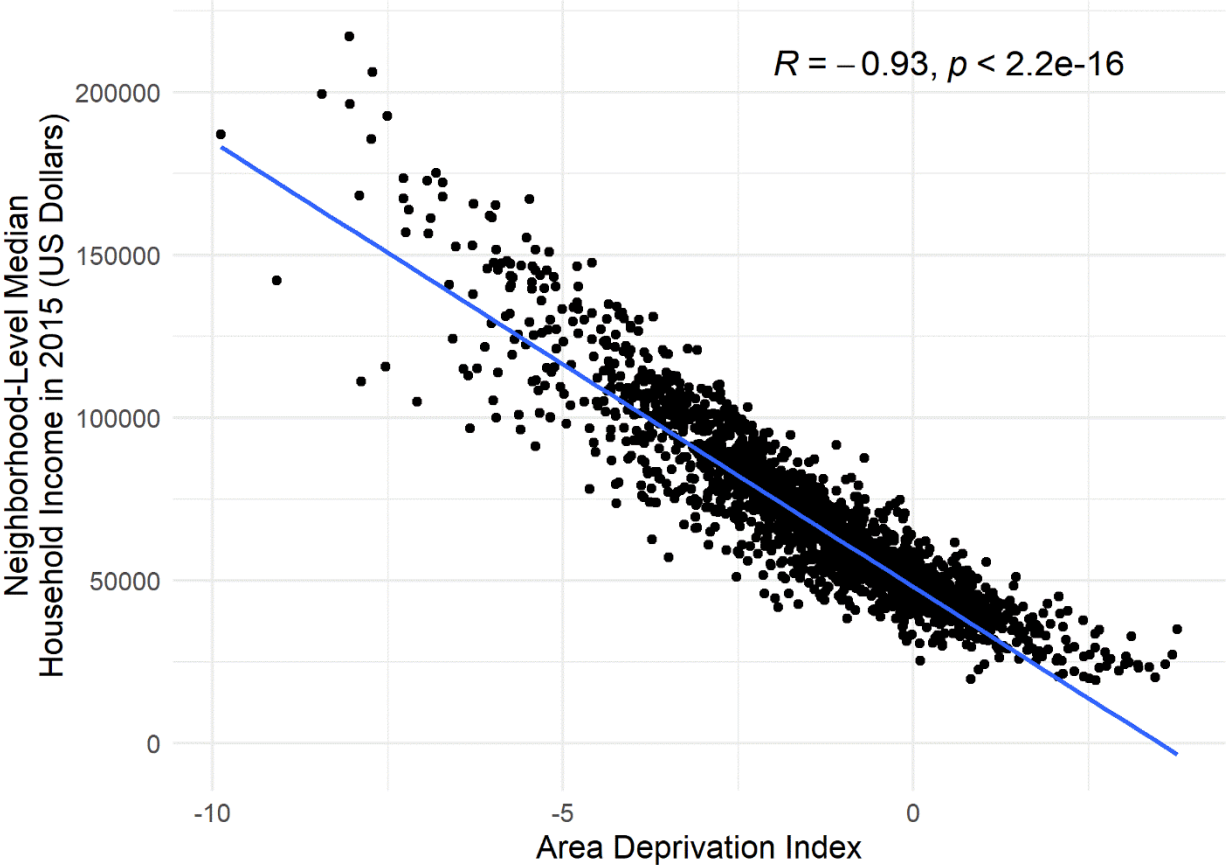

**eFigure 2.** Scatterplots showing the *non-significant* Pearson correlations between the components of the area deprivation index (ADI) in 2015 and subsequent patient-reported outcomes (PROs) of neurological and physical function. The ADI components in 2015 included percent unemployed (**A-C**), percent without high school education (**D-F**), percent living in crowded households (**G-I**), percent below poverty line (**J-L**) within the zip code of a participant’s residential address. The PROs included the median scores of MSRS-R (**A, D, G, J**), PDDS (**B, E, H, K**), and PROMIS-physical function (**C, F, I, L**) from the latest year between 2018 and 2020.

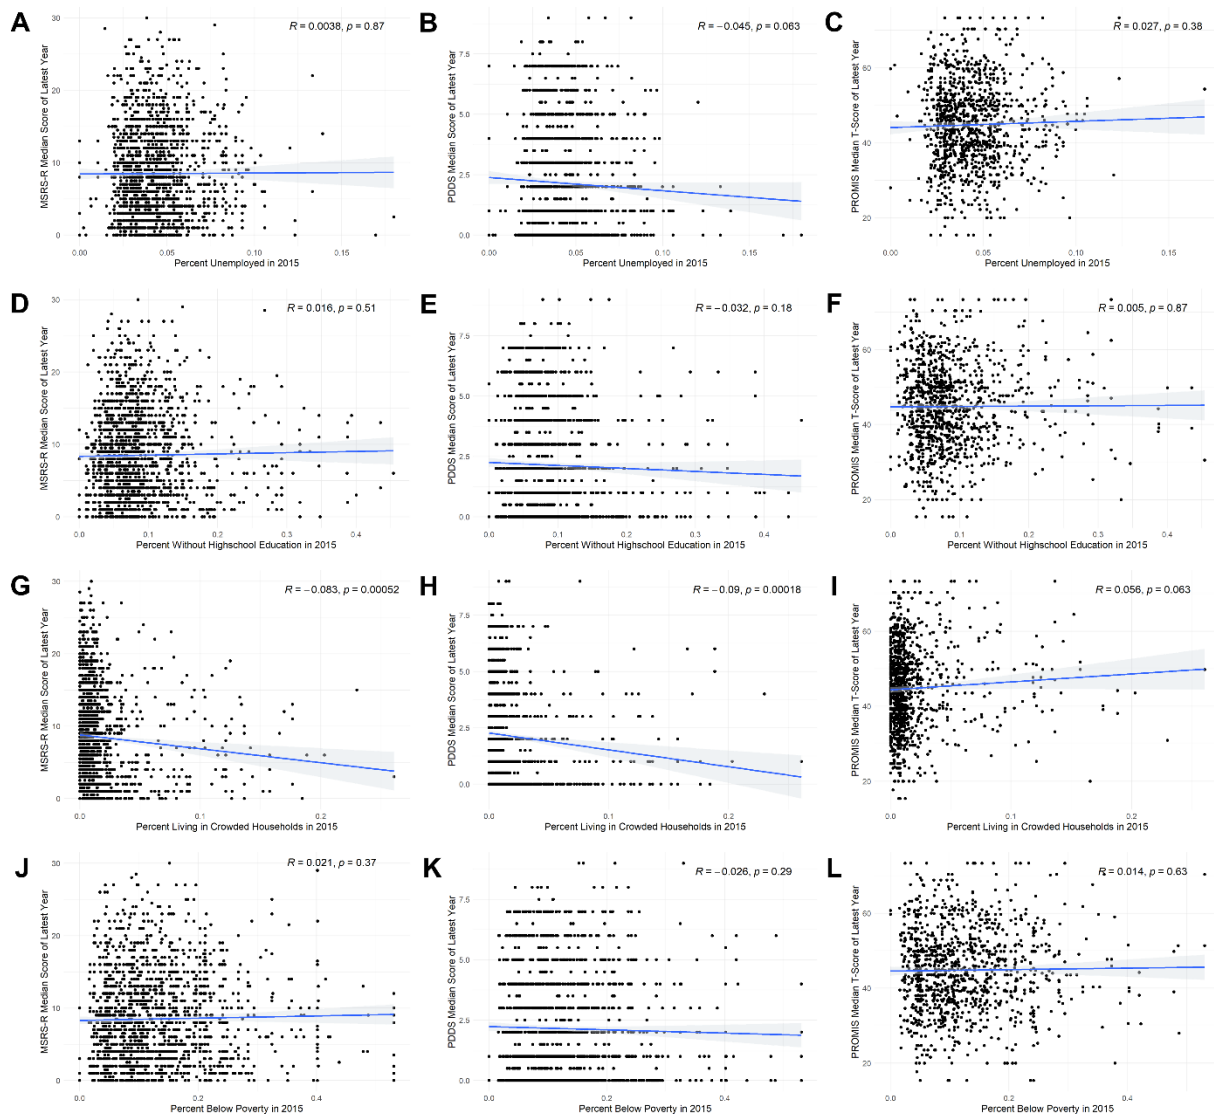

**eFigure 3.** Pearson correlations between neighborhood insurance coverage in 2015 and subsequent patient-reported outcomes (PROs) of neurological and physical function. Insurance coverage included percent with either *private* (A, C, D) or *Medicaid* (B, D, F) insurance within a neighborhood of the participant’s residential zip code in 2015. The PROs included median scores of MSRS-R (A, B), PDDS (C, D), and PROMIS-physical function (E, F) from the latest year between 2018 and 2020.

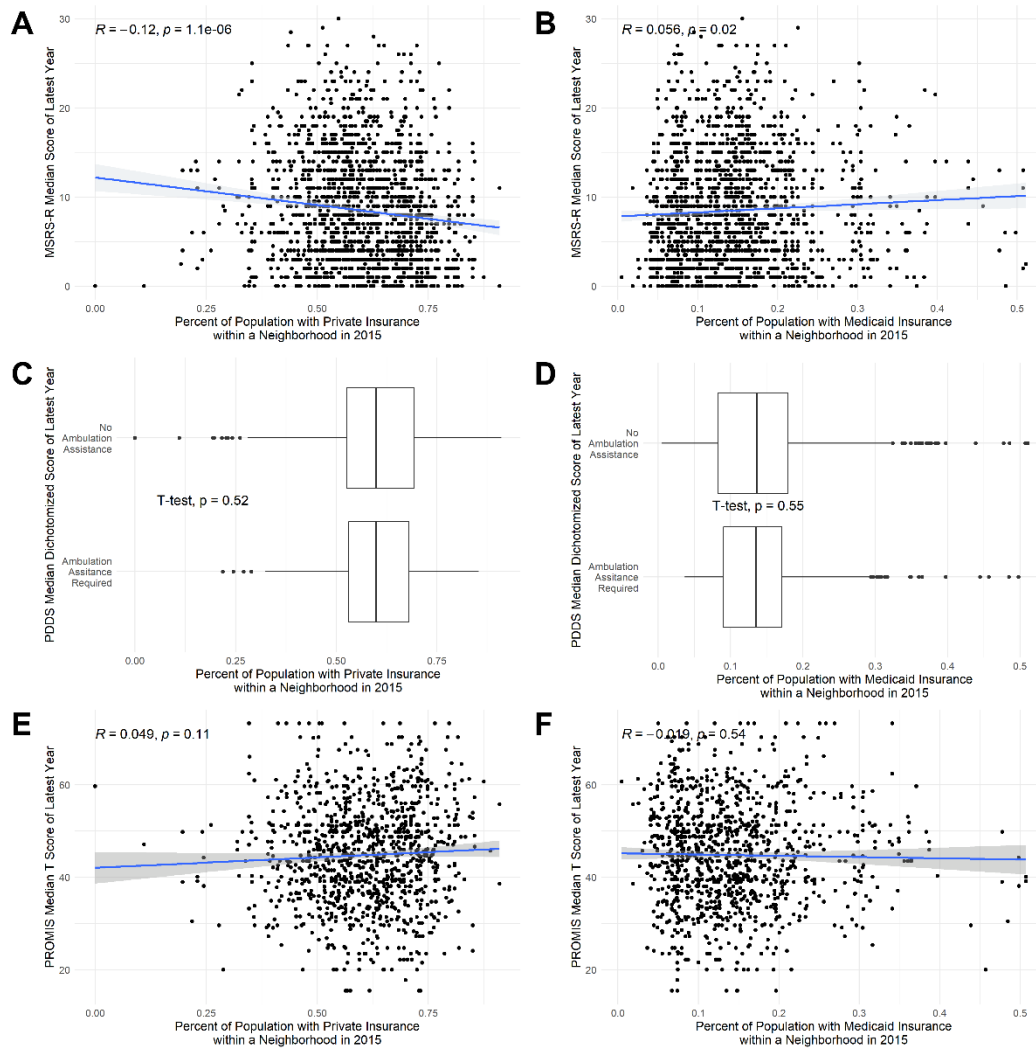

**eFigure 4. Covariate-adjusted mediation analyses to assess the mediating effect of healthcare insurance coverage.** The covariates included age of latest patient-reported outcome (PRO), sex, race and ethnicity, age of first symptom onset, disease duration, and type of disease-modifying therapy. Path model assessed whether the association between area deprivation index (ADI) in 2015 and PROs (*i.e.*, MSRS-R, PDDS, and PROMIS T-Score) from the latest year between 2018 and 2020 was mediated by *neighborhood percent of population with Medicaid insurance* or by *neighborhood percent of population with private insurance* within the same zip code as the participant’s residence. Path *c* represents the covariate-adjusted effect of ADI on PROs *without* mediators in the model. Path *c'* (indirect effect) represents the covariate-adjusted effect of ADI on PROs *with* mediators in the model. Path *a* represents the effect of ADI on neighborhood percent of population with private medical insurance or Medicaid insurance. Path *b* represents the effect of neighborhood percent of population with private or Medicaid insurance on PROs. Non-standardized  $\beta$  regression coefficients, 95% confidence intervals, and significance thresholds (\* $p < 0.05$ , \*\* $p < 0.01$ , \*\*\* $p < 0.001$ ) as reported by PROCESS Macro in SPSS are shown. Please also refer to Table 3 in the main text for the significance level for the mediating effect of healthcare insurance coverage.

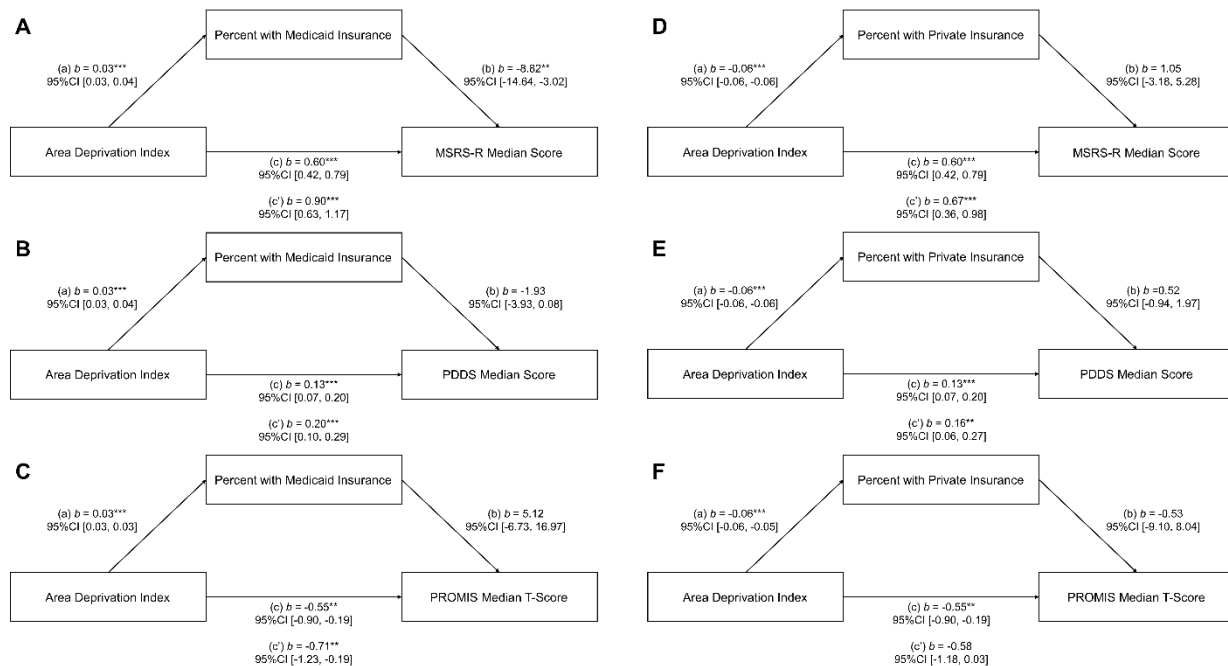

**eFigure 5.** Association between *individual-level household income brackets* in 2020 and the median scores of the patient-reported outcomes of neurological and physical function in 2020 in a subgroup analysis of the joint cohorts.

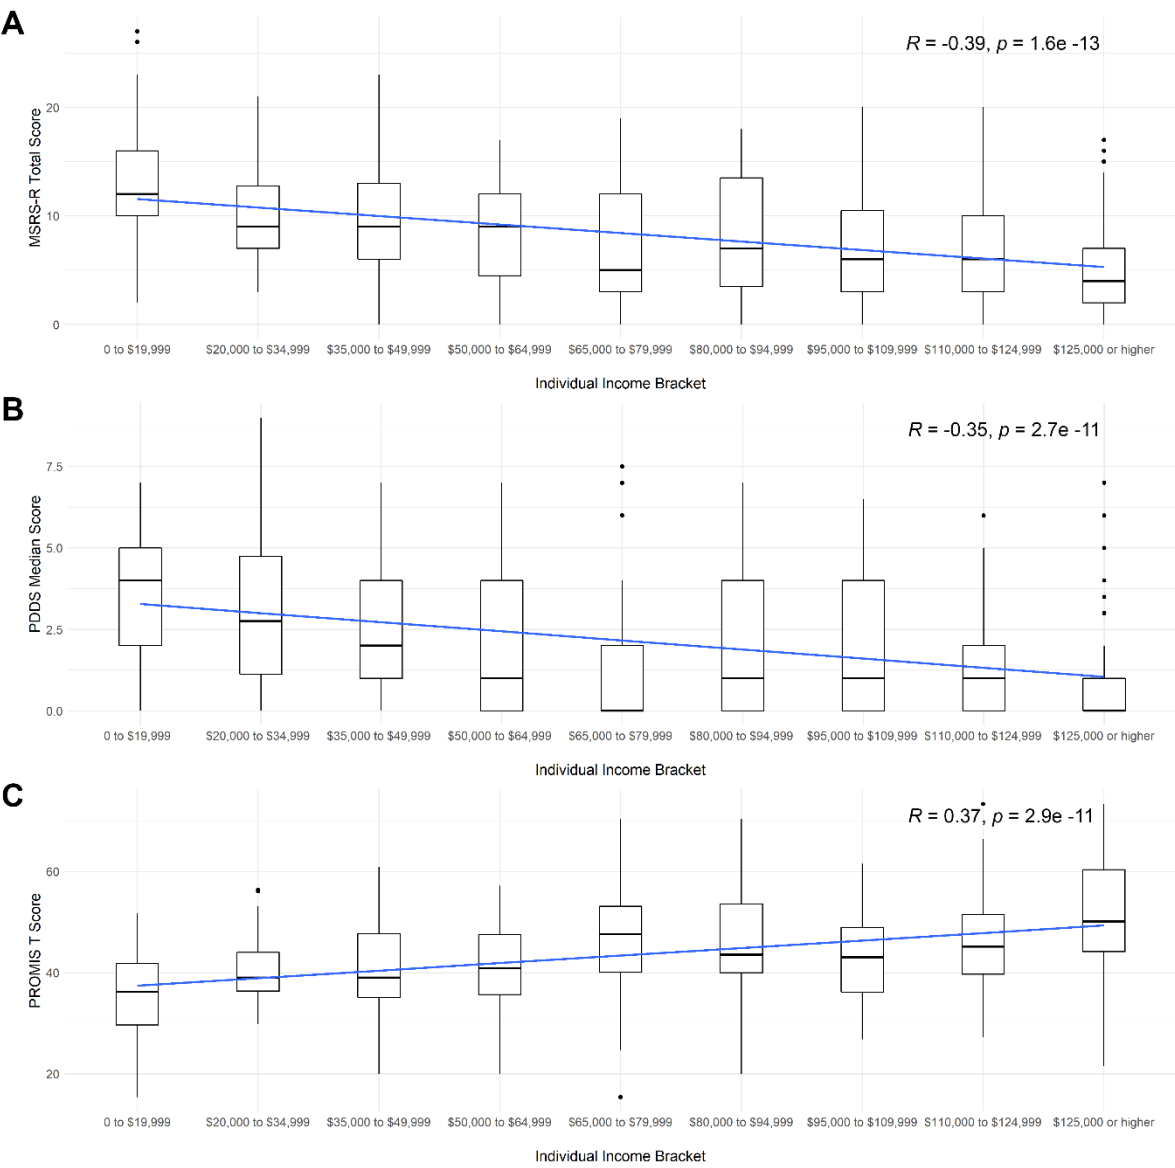

**eTable 1.** Eligibility criteria of the original cohort studies. The current study dataset that drew from the original cohort studies only included adult participants (age 18 years or older) with a neurologist confirmed diagnosis of multiple sclerosis.

| <i>Cohort Study</i>                                   | <i>Inclusion</i>                                                                                                                                                                                                                                                                                                                                                                                                                                                                                                      | <i>Exclusion</i> |
|-------------------------------------------------------|-----------------------------------------------------------------------------------------------------------------------------------------------------------------------------------------------------------------------------------------------------------------------------------------------------------------------------------------------------------------------------------------------------------------------------------------------------------------------------------------------------------------------|------------------|
| PROMOTE <sup>1</sup>                                  | Age 7 years or older<br><br>Neurologist-confirmed diagnosis of multiple sclerosis (MS) or related disorders, including a first central nervous system demyelinating episode with a positive MRI scan or abnormal MRI scans characteristic of MS but no clinical symptoms of the disease OR controls                                                                                                                                                                                                                   | None             |
| Pittsburgh COVID-19 and MS Study                      | Age 18 years or older<br><br>Neurologist-confirmed diagnosis of multiple sclerosis (MS) or related disorders OR controls<br><br>Live in the United States                                                                                                                                                                                                                                                                                                                                                             | None             |
| CUIMC <sup>2</sup> MS Genetics Study                  | Neurologist-confirmed diagnosis of multiple sclerosis (MS) or related disorders                                                                                                                                                                                                                                                                                                                                                                                                                                       | None             |
| CUIMC <sup>2</sup> COVID-19 and MS Study <sup>4</sup> | Age 18 years or older<br><br>Neurologist-confirmed diagnosis of multiple sclerosis (MS) or related disorders OR controls<br><br>Live in the United States                                                                                                                                                                                                                                                                                                                                                             | None             |
| GEMS <sup>3</sup>                                     | Age 5 years or older<br><br>First-degree family members of patients with multiple sclerosis (MS), or patients who have received anti-TNF alpha therapy as treatment for inflammatory diseases other than MS (e.g., Crohn's disease, psoriasis and rheumatoid arthritis) with OR without a neurologist-confirmed diagnosis of MS<br><br>OR<br><br>Patients that have been referred for an evaluation of first presentation of neurological symptoms but do not have a diagnosis of MS<br><br>Live in the United States | None             |

1. Prospective Investigation of Multiple Sclerosis in the Three Rivers Region (PROMOTE), NCT02994121
2. Columbia University Irving Medical Center (CUIMC)
3. Genes and Environment in Multiple Sclerosis (GEMS), NCT01353547
4. Also referred to as Multiple Sclerosis (MS) Patient Response to COVID-19 Outbreak Study

**eTable 2.** Covariate-adjusted regression analysis using *area deprivation index* in **2015** as the exposure and the median scores of patient-reported outcomes of neurological and physical function from the latest year between 2018 and 2020.

|                                          | MSRS-R                                   |                     |              | PDDS                  |                     |              | PROMIS                |                     |               |                  |
|------------------------------------------|------------------------------------------|---------------------|--------------|-----------------------|---------------------|--------------|-----------------------|---------------------|---------------|------------------|
|                                          | Estimate <sup>1</sup>                    | 95% CI <sup>2</sup> | P-value      | Estimate <sup>1</sup> | 95% CI <sup>2</sup> | P-value      | Estimate <sup>1</sup> | 95% CI <sup>2</sup> | P-value       |                  |
| Discovery Cohorts                        | Predictors                               |                     |              |                       |                     |              |                       |                     |               |                  |
|                                          | ADI                                      | 0.62                | 0.36, 0.89   | <b>&lt;0.001</b>      | 0.11                | 0.02, 0.20   | <b>0.02</b>           | -0.49               | -1.08, 0.10   | 0.106            |
|                                          | Age of latest PRO                        | 0.16                | 0.11, 0.21   | <b>&lt;0.001</b>      | 0.09                | 0.07, 0.10   | <b>&lt;0.001</b>      | -0.5                | -0.63, -0.37  | <b>&lt;0.001</b> |
|                                          | Sex, Male                                | -0.01               | -0.78, 0.76  | 0.98                  | 0.55                | 0.29, 0.81   | <b>&lt;0.001</b>      | -0.24               | -1.98, 1.49   | 0.785            |
|                                          | Sex, Other                               | 3.71                | -8.09, 15.50 | 0.538                 | 0.71                | -3.27, 4.70  | 0.726                 | -3.53               | -22.73, 15.67 | 0.718            |
|                                          | Race and Ethnicity, Other                | 1.23                | 0.10, 2.36   | <b>0.033</b>          | 0.11                | -0.28, 0.49  | 0.586                 | 0.09                | -3.04, 3.21   | 0.956            |
|                                          | Age of First Symptom Onset               | -0.08               | -0.13, -0.02 | <b>0.005</b>          | -0.04               | -0.06, -0.02 | <b>&lt;0.001</b>      | 0.19                | 0.07, 0.32    | <b>0.003</b>     |
|                                          | Disease Duration                         | 0                   | -0.06, 0.06  | 0.933                 | 0                   | -0.02, 0.02  | 0.633                 | 0.03                | -0.12, 0.17   | 0.716            |
|                                          | DMT Group, High Efficacy                 | 0.94                | 0.02, 1.86   | <b>0.046</b>          | 0.55                | 0.24, 0.87   | <b>0.001</b>          | -2.31               | -4.37, -0.24  | <b>0.029</b>     |
|                                          | DMT Group, Standard Efficacy             | -1.44               | -2.41, -0.46 | <b>0.004</b>          | -0.37               | -0.70, -0.04 | <b>0.03</b>           | 2.05                | -0.10, 4.20   | 0.061            |
|                                          | Observations                             | 1248                |              |                       | 1234                |              |                       | 645                 |               |                  |
| R <sup>2</sup> / R <sup>2</sup> adjusted | 0.104 / 0.097                            |                     |              | 0.208 / 0.202         |                     |              | 0.244 / 0.234         |                     |               |                  |
| Replication Cohorts                      | ADI                                      | 0.46                | 0.21, 0.72   | <b>&lt;0.001</b>      | 0.12                | 0.03, 0.21   | <b>0.009</b>          | -0.6                | -1.12, -0.08  | <b>0.025</b>     |
|                                          | Age of latest PRO                        | 0.17                | 0.10, 0.25   | <b>&lt;0.001</b>      | 0.07                | 0.04, 0.10   | <b>&lt;0.001</b>      | -0.4                | -0.56, -0.24  | <b>&lt;0.001</b> |
|                                          | Sex, Male                                | 0.33                | -0.87, 1.53  | 0.588                 | 0.15                | -0.28, 0.57  | 0.496                 | 1.58                | -0.96, 4.11   | 0.221            |
|                                          | Race and Ethnicity, Other                | -0.24               | -1.60, 1.12  | 0.725                 | 0.02                | -0.46, 0.50  | 0.939                 | -0.92               | -3.79, 1.95   | 0.53             |
|                                          | Age of First Symptom Onset               | -0.08               | -0.15, -0.01 | <b>0.036</b>          | -0.01               | -0.04, 0.01  | 0.335                 | 0.09                | -0.06, 0.24   | 0.248            |
|                                          | Disease Duration                         | -0.05               | -0.15, 0.05  | 0.313                 | 0.03                | -0.00, 0.06  | 0.084                 | -0.07               | -0.26, 0.12   | 0.467            |
|                                          | DMT Group, High Efficacy                 | 0.32                | -1.67, 2.32  | 0.751                 | 0.1                 | -0.61, 0.80  | 0.789                 | -2.63               | -6.55, 1.29   | 0.188            |
|                                          | DMT Group, Standard Efficacy             | -2.43               | -4.50, -0.36 | <b>0.022</b>          | -1.02               | -1.75, -0.29 | <b>0.006</b>          | 2.68                | -1.41, 6.77   | 0.199            |
|                                          | Observations                             | 421                 |              |                       | 416                 |              |                       | 378                 |               |                  |
|                                          | R <sup>2</sup> / R <sup>2</sup> adjusted | 0.152 / 0.136       |              |                       | 0.255 / 0.241       |              |                       | 0.214 / 0.197       |               |                  |

1. Beta-coefficient from regression analysis adjusting for covariates as described in the Methods.
2. 95% confidence intervals



**eTable 3.** Covariate-adjusted regression analysis using *area deprivation index* in **2018** as the exposure and the median scores of patient-reported outcomes of neurological and physical function from the latest year between 2018 and 2020.

|                     | Predictors                   | MSRS-R                |                     |                  | PDDS                  |                     |                  | PROMIS                |                     |                  |
|---------------------|------------------------------|-----------------------|---------------------|------------------|-----------------------|---------------------|------------------|-----------------------|---------------------|------------------|
|                     |                              | Estimate <sup>1</sup> | 95% CI <sup>2</sup> | P-value          | Estimate <sup>1</sup> | 95% CI <sup>2</sup> | P-value          | Estimate <sup>1</sup> | 95% CI <sup>2</sup> | P-value          |
| Discovery Cohorts   | ADI                          | 0.63                  | -0.90, -0.36        | <b>&lt;0.001</b> | 0.12                  | -0.21, -0.03        | <b>0.011</b>     | -0.6                  | 0.00, 1.19          | <b>0.048</b>     |
|                     | Age of latest PRO            | 0.16                  | 0.11, 0.22          | <b>&lt;0.001</b> | 0.09                  | 0.07, 0.10          | <b>&lt;0.001</b> | -0.5                  | -0.63, -0.38        | <b>&lt;0.001</b> |
|                     | Sex, Male                    | -0.01                 | -0.78, 0.75         | 0.972            | 0.55                  | 0.29, 0.81          | <b>&lt;0.001</b> | -0.31                 | -2.05, 1.42         | 0.722            |
|                     | Sex, Other                   | 3.62                  | -8.18, 15.41        | 0.547            | 0.72                  | -3.27, 4.70         | 0.724            | -3.64                 | -22.81, 15.53       | 0.709            |
|                     | Race and Ethnicity, Other    | 1.29                  | 0.17, 2.42          | <b>0.025</b>     | 0.11                  | -0.27, 0.50         | 0.566            | 0.03                  | -3.09, 3.14         | 0.987            |
|                     | Age of First Symptom Onset   | -0.08                 | -0.13, -0.02        | <b>0.005</b>     | -0.04                 | -0.06, -0.02        | <b>&lt;0.001</b> | 0.19                  | 0.07, 0.32          | 0.003            |
|                     | Disease Duration             | 0                     | -0.06, 0.06         | 0.92             | 0                     | -0.02, 0.02         | 0.634            | 0.03                  | -0.11, 0.17         | 0.714            |
|                     | DMT Group, High Efficacy     | 0.94                  | 0.02, 1.86          | <b>0.046</b>     | 0.55                  | 0.24, 0.87          | <b>0.001</b>     | -2.36                 | -4.43, -0.30        | <b>0.025</b>     |
|                     | DMT Group, Standard Efficacy | -1.44                 | -2.42, -0.47        | <b>0.004</b>     | -0.37                 | -0.70, -0.04        | <b>0.03</b>      | 2.02                  | -0.12, 4.16         | 0.064            |
|                     | Observations                 | 1248                  |                     |                  | 1234                  |                     |                  | 645                   |                     |                  |
|                     | R2 / R2 adjusted             | 0.104 / 0.097         |                     |                  | 0.208 / 0.202         |                     |                  | 0.246 / 0.235         |                     |                  |
| Replication Cohorts | ADI                          | 0.53                  | -0.79, -0.26        | <b>&lt;0.001</b> | 0.14                  | -0.23, -0.04        | <b>0.004</b>     | -0.71                 | 0.17, 1.26          | <b>0.011</b>     |
|                     | Age of latest PRO            | 0.17                  | 0.09, 0.25          | <b>&lt;0.001</b> | 0.07                  | 0.04, 0.10          | <b>&lt;0.001</b> | -0.39                 | -0.55, -0.24        | <b>&lt;0.001</b> |
|                     | Sex, Male                    | 0.39                  | -0.80, 1.59         | 0.517            | 0.16                  | -0.26, 0.59         | 0.446            | 1.47                  | -1.07, 4.00         | 0.256            |
|                     | Race and Ethnicity, Other    | -0.26                 | -1.61, 1.09         | 0.707            | 0.01                  | -0.46, 0.49         | 0.963            | -0.83                 | -3.69, 2.03         | 0.57             |
|                     | Age of First Symptom Onset   | -0.08                 | -0.15, -0.00        | <b>0.042</b>     | -0.01                 | -0.04, 0.01         | 0.358            | 0.08                  | -0.06, 0.23         | 0.264            |
|                     | Disease Duration             | -0.04                 | -0.14, 0.05         | 0.36             | 0.03                  | -0.00, 0.06         | 0.071            | -0.08                 | -0.27, 0.11         | 0.424            |
|                     | DMT Group, High Efficacy     | 0.33                  | -1.66, 2.32         | 0.748            | 0.1                   | -0.60, 0.80         | 0.787            | -2.64                 | -6.55, 1.28         | 0.186            |
|                     | DMT Group, Standard Efficacy | -2.43                 | -4.50, -0.37        | <b>0.021</b>     | -1.02                 | -1.75, -0.29        | <b>0.006</b>     | 2.68                  | -1.40, 6.76         | 0.198            |
|                     | Observations                 | 421                   |                     |                  | 416                   |                     |                  | 378                   |                     |                  |
|                     | R2 / R2 adjusted             | 0.157 / 0.140         |                     |                  | 0.258 / 0.243         |                     |                  | 0.217 / 0.200         |                     |                  |

1. Beta-coefficient from regression analysis adjusting for covariates as described in the Methods.
2. 95% confidence intervals

**eTable 4.** Covariate-adjusted regression analysis of *neighborhood median household income* in 2015 as the exposure and the median score of patient-reported outcomes of neurological and physical function from the latest year between 2018 and 2020 from the joint cohorts.

| <i>Predictors</i>                        | <b>MSRS-R</b>                |                            |                  | <b>PDDS</b>                  |                            |                  | <b>PROMIS</b>                |                            |                  |
|------------------------------------------|------------------------------|----------------------------|------------------|------------------------------|----------------------------|------------------|------------------------------|----------------------------|------------------|
|                                          | <i>Estimate</i> <sup>1</sup> | <i>95% CI</i> <sup>2</sup> | <i>P-value</i>   | <i>Estimate</i> <sup>1</sup> | <i>95% CI</i> <sup>2</sup> | <i>P-value</i>   | <i>Estimate</i> <sup>1</sup> | <i>95% CI</i> <sup>2</sup> | <i>P-value</i>   |
| Median Household Income                  | -3.80e-05                    | -5.05e-05, -2.56e-05       | <b>&lt;0.001</b> | -8.58e-06                    | -1.28e-05, -4.32e-06       | <b>0.045</b>     | 2.55e-05                     | 5.96e-07, 5.05e-05         | <b>&lt;0.001</b> |
| Age of Latest PRO                        | 0.16                         | 0.12, 0.21                 | <b>&lt;0.001</b> | -0.46                        | -0.56, -0.36               | <b>&lt;0.001</b> | 0.08                         | 0.07, 0.10                 | <b>&lt;0.001</b> |
| Sex, Male                                | 0.09                         | -0.57, 0.74                | 0.791            | 0.28                         | -1.14, 1.71                | 0.698            | 0.47                         | 0.25, 0.69                 | <b>&lt;0.001</b> |
| Sex, Other                               | 3.46                         | -8.07, 14.99               | 0.556            | -4.04                        | -23.56, 15.47              | 0.684            | 0.84                         | -3.08, 4.75                | 0.674            |
| Race and Ethnicity, Other                | 0.45                         | -0.43, 1.33                | 0.316            | -0.4                         | -2.42, 1.63                | 0.7              | 0.01                         | -0.29, 0.31                | 0.958            |
| Age of First Symptom Onset               | -0.08                        | -0.12, -0.03               | <b>0.001</b>     | 0.15                         | 0.05, 0.24                 | <b>0.003</b>     | -0.03                        | -0.05, -0.01               | <b>&lt;0.001</b> |
| Disease Duration                         | -0.01                        | -0.06, 0.04                | 0.575            | -0.01                        | -0.12, 0.10                | 0.844            | 0.01                         | -0.01, 0.03                | 0.245            |
| DMT Group, High Efficacy                 | 0.63                         | -0.19, 1.46                | 0.131            | -1.99                        | -3.78, -0.20               | <b>0.03</b>      | 0.44                         | 0.16, 0.72                 | <b>0.002</b>     |
| DMT Group, Standard Efficacy             | -1.81                        | -2.68, -0.94               | <b>&lt;0.001</b> | 2.65                         | 0.76, 4.53                 | <b>0.006</b>     | -0.52                        | -0.82, -0.22               | <b>0.001</b>     |
| Observations                             | 1665                         |                            |                  | 1646                         |                            |                  | 1020                         |                            |                  |
| R <sup>2</sup> / R <sup>2</sup> adjusted | 0.118 / 0.113                |                            |                  | 0.223 / 0.219                |                            |                  | 0.227 / 0.220                |                            |                  |

1. Beta-coefficient from regression analysis adjusting for covariates as described in the Methods.
2. 95% confidence intervals

**eTable 5.** Covariate-adjusted regression analysis of *neighborhood median home value* in 2015 as the exposure and the median score of patient-reported outcomes of neurological and physical function from the latest year between 2018 and 2020 from the joint cohorts.

| Predictors                               | MSRS-R                |                      |                  | PDDS                  |                      |                  | PROMIS                |                     |                  |
|------------------------------------------|-----------------------|----------------------|------------------|-----------------------|----------------------|------------------|-----------------------|---------------------|------------------|
|                                          | Estimate <sup>1</sup> | 95% CI <sup>2</sup>  | P-value          | Estimate <sup>1</sup> | 95% CI <sup>2</sup>  | P-value          | Estimate <sup>1</sup> | 95% CI <sup>2</sup> | P-value          |
| Median Home Value                        | -6.50e-06             | -8.16e-06, -4.84e-06 | <b>&lt;0.001</b> | -1.54e-06             | -2.11e-06, -9.65e-07 | <b>0.002</b>     | 4.98e-06              | 1.81e-06, 8.14e-06  | <b>&lt;0.001</b> |
| Age of Latest PRO                        | 0.16                  | 0.11, 0.20           | <b>&lt;0.001</b> | -0.45                 | -0.55, -0.35         | <b>&lt;0.001</b> | 0.08                  | 0.07, 0.10          | <b>&lt;0.001</b> |
| Sex, Male                                | 0.14                  | -0.51, 0.79          | 0.674            | 0.22                  | -1.20, 1.64          | 0.761            | 0.48                  | 0.26, 0.70          | <b>&lt;0.001</b> |
| Sex, Other                               | 5.84                  | -5.62, 17.31         | 0.318            | -5.9                  | -25.40, 13.60        | 0.553            | 1.4                   | -2.50, 5.31         | 0.481            |
| Race and Ethnicity, Other                | 1.2                   | 0.33, 2.06           | <b>0.007</b>     | -1.11                 | -3.14, 0.91          | 0.281            | 0.18                  | -0.12, 0.47         | 0.246            |
| Age of First Symptom Onset               | -0.07                 | -0.12, -0.03         | <b>0.001</b>     | 0.14                  | 0.05, 0.24           | <b>0.004</b>     | -0.03                 | -0.04, -0.01        | <b>&lt;0.001</b> |
| Disease Duration                         | -0.01                 | -0.06, 0.04          | 0.77             | -0.02                 | -0.13, 0.09          | 0.704            | 0.01                  | -0.01, 0.03         | 0.175            |
| DMT Group, High Efficacy                 | 0.76                  | -0.06, 1.58          | 0.068            | -2.19                 | -3.98, -0.39         | <b>0.017</b>     | 0.47                  | 0.19, 0.75          | <b>0.001</b>     |
| DMT Group, Standard Efficacy             | -1.72                 | -2.58, -0.86         | <b>&lt;0.001</b> | 2.51                  | 0.64, 4.39           | <b>0.009</b>     | -0.49                 | -0.79, -0.20        | <b>0.001</b>     |
| Observations                             | 1666                  |                      |                  | 1647                  |                      |                  | 1021                  |                     |                  |
| R <sup>2</sup> / R <sup>2</sup> adjusted | 0.130 / 0.125         |                      |                  | 0.230 / 0.225         |                      |                  | 0.232 / 0.225         |                     |                  |

1. Beta-coefficient from regression analysis adjusting for covariates as described in the Methods.
2. 95% confidence intervals

**eTable 6** Covariate-adjusted regression analysis of *neighborhood percentage of population with college education* in 2015 as the exposure and the median score of patient-reported outcomes of neurological and physical function from the latest year between 2018 and 2020 from the joint cohorts.

| Predictors                               | MSRS-R                |                     |                  | PDDS                  |                     |                  | PROMIS                |                     |                  |
|------------------------------------------|-----------------------|---------------------|------------------|-----------------------|---------------------|------------------|-----------------------|---------------------|------------------|
|                                          | Estimate <sup>1</sup> | 95% CI <sup>2</sup> | P-value          | Estimate <sup>1</sup> | 95% CI <sup>2</sup> | P-value          | Estimate <sup>1</sup> | 95% CI <sup>2</sup> | P-value          |
| Percent with College Education           | -7.31                 | -8.99, -5.64        | <b>&lt;0.001</b> | -1.62                 | -2.20, -1.05        | <b>&lt;0.001</b> | 9.31                  | 5.73, 12.89         | <b>&lt;0.001</b> |
| Age of Latest PRO                        | 0.17                  | 0.12, 0.21          | <b>&lt;0.001</b> | 0.08                  | 0.07, 0.10          | <b>&lt;0.001</b> | -0.45                 | -0.55, -0.35        | <b>&lt;0.001</b> |
| Sex, Male                                | 0.16                  | -0.48, 0.81         | 0.62             | 0.48                  | 0.26, 0.71          | <b>&lt;0.001</b> | 0.03                  | -1.38, 1.44         | 0.966            |
| Sex, Other                               | 5.27                  | -6.14, 16.68        | 0.365            | 1.24                  | -2.66, 5.13         | 0.534            | -6.52                 | -25.85, 12.80       | 0.508            |
| Race and Ethnicity, Other                | 0.76                  | -0.10, 1.62         | 0.083            | 0.08                  | -0.22, 0.37         | 0.618            | -0.45                 | -2.44, 1.54         | 0.656            |
| Age of First Symptom Onset               | -0.07                 | -0.12, -0.03        | <b>0.001</b>     | -0.03                 | -0.04, -0.01        | <b>&lt;0.001</b> | 0.13                  | 0.04, 0.23          | <b>0.007</b>     |
| Disease Duration                         | -0.01                 | -0.06, 0.04         | 0.768            | 0.01                  | -0.01, 0.03         | 0.181            | -0.03                 | -0.14, 0.08         | 0.596            |
| DMT Group, High Efficacy                 | 0.74                  | -0.08, 1.55         | 0.077            | 0.46                  | 0.18, 0.74          | <b>0.001</b>     | -2.41                 | -4.19, -0.63        | <b>0.008</b>     |
| DMT Group, Standard Efficacy             | -1.74                 | -2.60, -0.88        | <b>&lt;0.001</b> | -0.5                  | -0.80, -0.21        | <b>0.001</b>     | 2.19                  | 0.32, 4.06          | <b>0.022</b>     |
| Observations                             | 1668                  |                     |                  | 1649                  |                     |                  | 1022                  |                     |                  |
| R <sup>2</sup> / R <sup>2</sup> adjusted | 0.138 / 0.133         |                     |                  | 0.231 / 0.226         |                     |                  | 0.245 / 0.238         |                     |                  |

1. Beta-coefficient from regression analysis adjusting for covariates as described in the Methods.
2. 95% confidence intervals

**eTable 7.** Covariate-adjusted regression analysis of *neighborhood percentage of population with more than one occupant per room* (indicating a crowded household) in 2015 as the exposure and the median score of patient-reported outcomes of neurological and physical function from the latest year between 2018 and 2020 from the joint cohorts.

| Predictors                               | MSRS-R                |                     |                  | PDDS                  |                     |                  | PROMIS                |                     |                  |
|------------------------------------------|-----------------------|---------------------|------------------|-----------------------|---------------------|------------------|-----------------------|---------------------|------------------|
|                                          | Estimate <sup>1</sup> | 95% CI <sup>2</sup> | P-value          | Estimate <sup>1</sup> | 95% CI <sup>2</sup> | P-value          | Estimate <sup>1</sup> | 95% CI <sup>2</sup> | P-value          |
| Percent Living in Crowded Households     | -16.83                | -28.78, -4.89       | <b>0.006</b>     | -3.86                 | -7.91, 0.18         | 0.061            | -3.94                 | -27.30, 19.41       | 0.741            |
| Age of Latest PRO                        | 0.17                  | 0.12, 0.21          | <b>&lt;0.001</b> | 0.08                  | 0.07, 0.10          | <b>&lt;0.001</b> | -0.47                 | -0.56, -0.37        | <b>&lt;0.001</b> |
| Sex, Male                                | -0.05                 | -0.71, 0.60         | 0.875            | 0.44                  | 0.21, 0.66          | <b>&lt;0.001</b> | 0.47                  | -0.95, 1.89         | 0.518            |
| Sex, Other                               | 3.7                   | -7.93, 15.33        | 0.533            | 0.89                  | -3.04, 4.82         | 0.656            | -3.67                 | -23.24, 15.89       | 0.713            |
| Race and Ethnicity, Other                | 1.32                  | 0.41, 2.24          | <b>0.005</b>     | 0.2                   | -0.11, 0.52         | 0.199            | -0.51                 | -2.68, 1.66         | 0.645            |
| Age of First Symptom Onset               | -0.08                 | -0.12, -0.03        | <b>0.001</b>     | -0.03                 | -0.05, -0.02        | <b>&lt;0.001</b> | 0.15                  | 0.05, 0.25          | <b>0.002</b>     |
| Disease Duration                         | -0.02                 | -0.07, 0.03         | 0.539            | 0.01                  | -0.01, 0.03         | 0.263            | -0.01                 | -0.12, 0.11         | 0.895            |
| DMT Group, High Efficacy                 | 0.48                  | -0.35, 1.31         | 0.254            | 0.41                  | 0.12, 0.69          | <b>0.005</b>     | -1.76                 | -3.54, 0.03         | 0.053            |
| DMT Group, Standard Efficacy             | -2.03                 | -2.91, -1.16        | <b>&lt;0.001</b> | -0.57                 | -0.87, -0.27        | <b>&lt;0.001</b> | 2.86                  | 0.99, 4.74          | <b>0.003</b>     |
| Observations                             | 1668                  |                     |                  | 1649                  |                     |                  | 1022                  |                     |                  |
| R <sup>2</sup> / R <sup>2</sup> adjusted | 0.104 / 0.099         |                     |                  | 0.218 / 0.214         |                     |                  | 0.226 / 0.219         |                     |                  |

1. Beta-coefficient from regression analysis adjusting for covariates as described in the Methods.
2. 95% confidence intervals

**eTable 8.** Covariate-adjusted regression analysis of *neighborhood percentage of population without high school education* in 2015 as the exposure and the median score of patient-reported outcomes of neurological and physical function from the latest year between 2018 and 2020 from the joint cohorts.

| Predictors                               | MSRS-R                |                     |                  | PDDS                  |                     |                  | PROMIS                |                     |                  |
|------------------------------------------|-----------------------|---------------------|------------------|-----------------------|---------------------|------------------|-----------------------|---------------------|------------------|
|                                          | Estimate <sup>1</sup> | 95% CI <sup>2</sup> | P-value          | Estimate <sup>1</sup> | 95% CI <sup>2</sup> | P-value          | Estimate <sup>1</sup> | 95% CI <sup>2</sup> | P-value          |
| Percent without High School Education    | 4.14                  | -1.26, 9.54         | 0.133            | 0.82                  | -1.01, 2.64         | 0.381            | -11.39                | -22.25, -0.52       | <b>0.04</b>      |
| Age of Latest PRO                        | 0.17                  | 0.13, 0.22          | <b>&lt;0.001</b> | 0.08                  | 0.07, 0.10          | <b>&lt;0.001</b> | -0.47                 | -0.57, -0.37        | <b>&lt;0.001</b> |
| Sex, Male                                | -0.04                 | -0.70, 0.62         | 0.901            | 0.44                  | 0.22, 0.66          | <b>&lt;0.001</b> | 0.39                  | -1.03, 1.81         | 0.59             |
| Sex, Other                               | 3.22                  | -8.42, 14.86        | 0.587            | 0.78                  | -3.15, 4.71         | 0.697            | -4.22                 | -23.73, 15.29       | 0.672            |
| Race and Ethnicity, Other                | 0.72                  | -0.20, 1.63         | 0.126            | 0.07                  | -0.24, 0.38         | 0.654            | 0.1                   | -2.03, 2.24         | 0.923            |
| Age of First Symptom Onset               | -0.08                 | -0.13, -0.04        | <b>&lt;0.001</b> | -0.03                 | -0.05, -0.02        | <b>&lt;0.001</b> | 0.15                  | 0.05, 0.25          | <b>0.002</b>     |
| Disease Duration                         | -0.02                 | -0.07, 0.03         | 0.514            | 0.01                  | -0.01, 0.03         | 0.273            | -0.01                 | -0.12, 0.10         | 0.861            |
| DMT Group, High Efficacy                 | 0.44                  | -0.39, 1.27         | 0.3              | 0.4                   | 0.11, 0.68          | <b>0.006</b>     | -1.79                 | -3.57, -0.01        | <b>0.049</b>     |
| DMT Group, Standard Efficacy             | -2.02                 | -2.90, -1.15        | <b>&lt;0.001</b> | -0.57                 | -0.87, -0.27        | <b>&lt;0.001</b> | 2.79                  | 0.92, 4.66          | <b>0.003</b>     |
| Observations                             | 1668                  |                     |                  | 1649                  |                     |                  | 1022                  |                     |                  |
| R <sup>2</sup> / R <sup>2</sup> adjusted | 0.101 / 0.096         |                     |                  | 0.217 / 0.212         |                     |                  | 0.228 / 0.222         |                     |                  |

- 1 Beta-coefficient from regression analysis adjusting for covariates as described in the Methods.
- 2 95% confidence intervals

**eTable 9.** Covariate-adjusted regression analysis of *neighborhood percentage of population unemployed* in 2015 as the exposure and the median score of patient-reported outcomes of neurological and physical function from the latest year between 2018 and 2020 from the joint cohorts.

| <i>Predictors</i>                        | <b>MSRS-R</b>                |                            |                  | <b>PDDS</b>                  |                            |                  | <b>PROMIS</b>                |                            |                  |
|------------------------------------------|------------------------------|----------------------------|------------------|------------------------------|----------------------------|------------------|------------------------------|----------------------------|------------------|
|                                          | <i>Estimate</i> <sup>1</sup> | <i>95% CI</i> <sup>2</sup> | <i>P-value</i>   | <i>Estimate</i> <sup>1</sup> | <i>95% CI</i> <sup>2</sup> | <i>P-value</i>   | <i>Estimate</i> <sup>1</sup> | <i>95% CI</i> <sup>2</sup> | <i>P-value</i>   |
| Percent Unemployed                       | 6.36                         | -10.09, 22.81              | 0.448            | -0.22                        | -5.81, 5.36                | 0.937            | -2.46                        | -37.74, 32.81              | 0.891            |
| Age of Latest PRO                        | 0.17                         | 0.13, 0.22                 | <b>&lt;0.001</b> | 0.08                         | 0.07, 0.10                 | <b>&lt;0.001</b> | -0.46                        | -0.56, -0.37               | <b>&lt;0.001</b> |
| Sex, Male                                | -0.05                        | -0.71, 0.61                | 0.88             | 0.43                         | 0.21, 0.66                 | <b>&lt;0.001</b> | 0.46                         | -0.96, 1.88                | 0.524            |
| Sex, Other                               | 3.03                         | -8.62, 14.67               | 0.61             | 0.75                         | -3.17, 4.68                | 0.706            | -3.79                        | -23.34, 15.76              | 0.704            |
| Race and Ethnicity, Other                | 0.82                         | -0.09, 1.74                | 0.077            | 0.12                         | -0.19, 0.43                | 0.462            | -0.61                        | -2.69, 1.47                | 0.564            |
| Age of First Symptom Onset               | -0.08                        | -0.12, -0.03               | <b>0.001</b>     | -0.03                        | -0.05, -0.02               | <b>&lt;0.001</b> | 0.15                         | 0.05, 0.25                 | <b>0.002</b>     |
| Disease Duration                         | -0.02                        | -0.07, 0.03                | 0.527            | 0.01                         | -0.01, 0.03                | 0.277            | -0.01                        | -0.12, 0.10                | 0.884            |
| DMT Group, High Efficacy                 | 0.45                         | -0.38, 1.28                | 0.291            | 0.4                          | 0.11, 0.68                 | <b>0.006</b>     | -1.77                        | -3.56, 0.01                | 0.052            |
| DMT Group, Standard Efficacy             | -2.03                        | -2.91, -1.16               | <b>&lt;0.001</b> | -0.57                        | -0.87, -0.27               | <b>&lt;0.001</b> | 2.86                         | 0.99, 4.73                 | <b>0.003</b>     |
| Observations                             | 1668                         |                            |                  | 1649                         |                            |                  | 1022                         |                            |                  |
| R <sup>2</sup> / R <sup>2</sup> adjusted | 0.100 / 0.095                |                            |                  | 0.216 / 0.212                |                            |                  | 0.226 / 0.219                |                            |                  |

1. Beta-coefficient from regression analysis adjusting for covariates as described in the Methods.
2. 95% confidence intervals

**eTable 10.** Covariate-adjusted regression analysis of *neighborhood percentage of population living below the poverty line* in 2015 as the exposure and the median score of patient-reported outcomes of neurological and physical function from the latest year between 2018 and 2020 from the joint cohorts.

| Predictors                               | MSRS-R                |                     |                  | PDDS                  |                     |                  | PROMIS                |                     |                  |
|------------------------------------------|-----------------------|---------------------|------------------|-----------------------|---------------------|------------------|-----------------------|---------------------|------------------|
|                                          | Estimate <sup>1</sup> | 95% CI <sup>2</sup> | P-value          | Estimate <sup>1</sup> | 95% CI <sup>2</sup> | P-value          | Estimate <sup>1</sup> | 95% CI <sup>2</sup> | P-value          |
| Percent Below Poverty Line               | 1.54                  | -2.00, 5.09         | 0.393            | 0.23                  | -0.97, 1.43         | 0.706            | 1.14                  | -6.63, 8.92         | 0.773            |
| Age of Latest PRO                        | 0.17                  | 0.13, 0.22          | <b>&lt;0.001</b> | 0.08                  | 0.07, 0.10          | <b>&lt;0.001</b> | -0.46                 | -0.56, -0.37        | <b>&lt;0.001</b> |
| Sex, Male                                | -0.05                 | -0.71, 0.61         | 0.876            | 0.44                  | 0.21, 0.66          | <b>&lt;0.001</b> | 0.48                  | -0.94, 1.90         | 0.509            |
| Sex, Other                               | 2.87                  | -8.78, 14.53        | 0.629            | 0.72                  | -3.21, 4.65         | 0.719            | -3.97                 | -23.54, 15.61       | 0.691            |
| Race and Ethnicity, Other                | 0.8                   | -0.12, 1.72         | 0.088            | 0.09                  | -0.22, 0.41         | 0.554            | -0.73                 | -2.81, 1.36         | 0.495            |
| Age of First Symptom Onset               | -0.08                 | -0.12, -0.03        | <b>0.001</b>     | -0.03                 | -0.05, -0.02        | <b>&lt;0.001</b> | 0.15                  | 0.05, 0.25          | <b>0.002</b>     |
| Disease Duration                         | -0.02                 | -0.07, 0.03         | 0.516            | 0.01                  | -0.01, 0.03         | 0.273            | -0.01                 | -0.12, 0.10         | 0.892            |
| DMT Group, High Efficacy                 | 0.45                  | -0.38, 1.28         | 0.283            | 0.4                   | 0.12, 0.68          | <b>0.006</b>     | -1.75                 | -3.54, 0.04         | 0.055            |
| DMT Group, Standard Efficacy             | -2.02                 | -2.89, -1.14        | <b>&lt;0.001</b> | -0.57                 | -0.87, -0.27        | <b>&lt;0.001</b> | 2.89                  | 1.01, 4.77          | <b>0.003</b>     |
| Observations                             | 1668                  |                     |                  | 1649                  |                     |                  | 1022                  |                     |                  |
| R <sup>2</sup> / R <sup>2</sup> adjusted | 0.100 / 0.095         |                     |                  | 0.216 / 0.212         |                     |                  | 0.226 / 0.219         |                     |                  |

1. Beta-coefficient from regression analysis adjusting for covariates as described in the Methods.
2. 95% confidence intervals



**eTable 11.** Covariate-adjusted regression analysis using *neighborhood percent of population with private insurance* in 2015 as the exposure and the median scores of patient-reported outcomes of neurological and physical function from the latest year between 2018 and 2020 from the joint cohorts.

| Predictors                               | MSRS-R                |                     |                  | PDDS                  |                     |                  | PROMIS                |                     |                  |
|------------------------------------------|-----------------------|---------------------|------------------|-----------------------|---------------------|------------------|-----------------------|---------------------|------------------|
|                                          | Estimate <sup>1</sup> | 95% CI <sup>2</sup> | P-Value          | Estimate <sup>1</sup> | 95% CI <sup>2</sup> | P-Value          | Estimate <sup>1</sup> | 95% CI <sup>2</sup> | P-Value          |
| Percent with Private Insurance           | 1.2                   | -3.03, 5.42         | 0.578            | 0.68                  | -0.77, 2.12         | 0.356            | -0.34                 | -9.23, 8.54         | 0.94             |
| ADI                                      | 0.71                  | 0.40, 1.02          | <b>&lt;0.001</b> | 0.18                  | 0.08, 0.29          | <b>0.001</b>     | -0.65                 | -1.28, -0.02        | <b>0.043</b>     |
| Age of Latest PRO                        | 0.17                  | 0.12, 0.21          | <b>&lt;0.001</b> | 0.08                  | 0.07, 0.10          | <b>&lt;0.001</b> | -0.46                 | -0.56, -0.36        | <b>&lt;0.001</b> |
| Sex, Male                                | 0.12                  | -0.53, 0.78         | 0.709            | 0.48                  | 0.25, 0.70          | <b>&lt;0.001</b> | 0.2                   | -1.22, 1.63         | 0.779            |
| Sex, Other                               | 4.09                  | -7.40, 15.59        | 0.485            | 0.97                  | -2.94, 4.88         | 0.626            | -4.77                 | -24.24, 14.69       | 0.63             |
| Race and Ethnicity, Other                | 0.41                  | -0.48, 1.30         | 0.366            | 0.01                  | -0.29, 0.32         | 0.931            | -0.21                 | -2.29, 1.87         | 0.841            |
| Age of First Symptom Onset               | -0.07                 | -0.12, -0.03        | <b>0.001</b>     | -0.03                 | -0.04, -0.01        | <b>&lt;0.001</b> | 0.14                  | 0.05, 0.24          | <b>0.004</b>     |
| Disease Duration                         | -0.01                 | -0.06, 0.04         | 0.674            | 0.01                  | -0.01, 0.03         | 0.204            | -0.02                 | -0.13, 0.09         | 0.734            |
| DMT Group, High Efficacy                 | 0.68                  | -0.14, 1.50         | 0.106            | 0.45                  | 0.17, 0.73          | <b>0.002</b>     | -2.17                 | -3.96, -0.38        | <b>0.018</b>     |
| DMT Group, Standard Efficacy             | -1.76                 | -2.63, -0.89        | <b>&lt;0.001</b> | -0.51                 | -0.81, -0.21        | <b>0.001</b>     | 2.43                  | 0.55, 4.31          | <b>0.011</b>     |
| Observations                             | 1668                  |                     |                  | 1649                  |                     |                  | 1022                  |                     |                  |
| R <sup>2</sup> / R <sup>2</sup> adjusted | 0.124 / 0.119         |                     |                  | 0.226 / 0.221         |                     |                  | 0.233 / 0.226         |                     |                  |

1. Beta-coefficient from regression analysis adjusting for covariates as described in the Methods. These analyses *additionally* adjust for the area deprivation index (**ADI**) in 2015.
2. 95% confidence intervals

**eTable 12.** Covariate-adjusted regression analysis using *neighborhood percent of population with Medicaid insurance* in 2015 as the exposure and the median scores of patient-reported outcomes of neurological and physical function from the latest year between 2018 and 2020 from the joint cohorts.

| Predictors                               | MSRS-R                |                     |              | PDDS                  |                     |              | PROMIS                |                     |         |
|------------------------------------------|-----------------------|---------------------|--------------|-----------------------|---------------------|--------------|-----------------------|---------------------|---------|
|                                          | Estimate <sup>1</sup> | 95% CI <sup>2</sup> | P-Value      | Estimate <sup>1</sup> | 95% CI <sup>2</sup> | P-Value      | Estimate <sup>1</sup> | 95% CI <sup>2</sup> | P-Value |
| Percent with Medicaid Insurance          | -9.53                 | -15.39, -3.67       | <b>0.001</b> | -2.37                 | -4.38, -0.36        | <b>0.021</b> | 5.38                  | -7.06, 17.82        | 0.396   |
| ADI                                      | 0.96                  | 0.69, 1.23          | <0.001       | 0.22                  | 0.13, 0.32          | <0.001       | -0.81                 | -1.36, -0.25        | 0.004   |
| Age of Latest PRO                        | 0.16                  | 0.12, 0.21          | <0.001       | 0.08                  | 0.07, 0.10          | <0.001       | -0.46                 | -0.55, -0.36        | <0.001  |
| Sex, Male                                | 0.15                  | -0.50, 0.80         | 0.649        | 0.48                  | 0.26, 0.70          | <0.001       | 0.19                  | -1.23, 1.61         | 0.793   |
| Sex, Other                               | 4.18                  | -7.28, 15.64        | 0.475        | 1                     | -2.91, 4.90         | 0.616        | -4.8                  | -24.25, 14.66       | 0.629   |
| Race and Ethnicity, Other                | 0.8                   | -0.11, 1.72         | 0.086        | 0.1                   | -0.22, 0.41         | 0.545        | -0.52                 | -2.67, 1.64         | 0.638   |
| Age of First Symptom Onset               | -0.07                 | -0.12, -0.03        | 0.001        | -0.03                 | -0.04, -0.01        | <0.001       | 0.14                  | 0.04, 0.24          | 0.004   |
| Disease Duration                         | -0.01                 | -0.06, 0.04         | 0.714        | 0.01                  | -0.01, 0.03         | 0.195        | -0.02                 | -0.13, 0.09         | 0.72    |
| DMT Group, High Efficacy                 | 0.74                  | -0.08, 1.56         | 0.077        | 0.46                  | 0.18, 0.75          | 0.001        | -2.21                 | -4.00, -0.42        | 0.016   |
| DMT Group, Standard Efficacy             | -1.73                 | -2.59, -0.86        | <0.001       | -0.5                  | -0.80, -0.20        | 0.001        | 2.42                  | 0.54, 4.30          | 0.012   |
| Observations                             | 1668                  |                     |              | 1649                  |                     |              | 1022                  |                     |         |
| R <sup>2</sup> / R <sup>2</sup> adjusted | 0.129 / 0.124         |                     |              | 0.228 / 0.223         |                     |              | 0.234 / 0.227         |                     |         |

1. Beta-coefficient from regression analysis adjusting for covariates as described in the Methods. These analyses *additionally* adjust for the area deprivation index (**ADI**) in 2015.
2. 95% confidence intervals

**eTable 13.** Covariate-adjusted regression analysis using nine *individual household income brackets* ranging from “\$0 to \$19,999” to “\$125,000 or higher” as exposure and the patient-reported outcomes of neurological and physical function for each participant in subgroups of the joint cohorts that accounts for the area deprivation index.

| Predictors                               | MSRS-R                |                     |         | PDDS                  |                     |         | PROMIS                |                     |         |
|------------------------------------------|-----------------------|---------------------|---------|-----------------------|---------------------|---------|-----------------------|---------------------|---------|
|                                          | Estimate <sup>1</sup> | 95% CI <sup>2</sup> | P-value | Estimate <sup>1</sup> | 95% CI <sup>2</sup> | P-value | Estimate <sup>1</sup> | 95% CI <sup>2</sup> | P-value |
| Individual Household Income Bracket      | -0.71                 | -0.92, -0.50        | <0.001  | -0.25                 | -0.33, -0.17        | <0.001  | 1.29                  | 0.87, 1.71          | <0.001  |
| Age of latest PRO                        | 0.25                  | 0.16, 0.34          | <0.001  | 0.1                   | 0.07, 0.13          | <0.001  | -0.51                 | -0.69, -0.34        | <0.001  |
| Sex, Male                                | -0.09                 | -1.53, 1.36         | 0.905   | 0.55                  | 0.01, 1.09          | 0.047   | -0.41                 | -3.25, 2.42         | 0.776   |
| Sex, Other                               | 0.98                  | -8.95, 10.91        | 0.846   | 1.06                  | -2.67, 4.79         | 0.576   | -8.4                  | -26.90, 10.10       | 0.372   |
| Race and Ethnicity, Other                | 1.19                  | -1.15, 3.52         | 0.317   | -0.31                 | -1.19, 0.56         | 0.484   | 0.74                  | -3.89, 5.38         | 0.752   |
| Age of First Symptom Onset               | -0.19                 | -0.27, -0.10        | <0.001  | -0.06                 | -0.09, -0.02        | 0.001   | 0.24                  | 0.08, 0.41          | 0.004   |
| Disease Duration                         | -0.13                 | -0.23, -0.02        | 0.018   | -0.03                 | -0.07, 0.01         | 0.172   | 0.09                  | -0.11, 0.29         | 0.365   |
| DMT Group, High Efficacy                 | 1.27                  | -0.33, 2.86         | 0.119   | 0.45                  | -0.15, 1.05         | 0.141   | -1.91                 | -4.96, 1.15         | 0.22    |
| DMT Group, Standard Efficacy             | 0.39                  | -1.31, 2.08         | 0.653   | -0.18                 | -0.82, 0.45         | 0.574   | 2.72                  | -0.57, 6.01         | 0.105   |
| ADI                                      | 0.19                  | -0.22, 0.60         | 0.365   | -0.02                 | -0.18, 0.13         | 0.756   | -0.19                 | -1.00, 0.62         | 0.648   |
| Observations                             | 320                   |                     |         | 320                   |                     |         | 284                   |                     |         |
| R <sup>2</sup> / R <sup>2</sup> adjusted | 0.264 / 0.240         |                     |         | 0.306 / 0.284         |                     |         | 0.342 / 0.318         |                     |         |

1. Beta-coefficient from regression analysis adjusting for covariates as described in the Methods. These analyses *additionally* adjust for the area deprivation index (**ADI**) in 2015.
2. 95% confidence intervals
